# Supplementary material for: A simple and robust approach to reducing contact resistance in organic transistors
Source: PubMed Central journal article supplement (PMC6277450; doi:10.1038/s41467-018-07388-3), 2018-12-03
Supplement: 41467_2018_7388_MOESM1_ESM.pdf [file 41467_2018_7388_MOESM1_ESM.pdf]

**Supplementary Information for:**

**A simple and robust approach to reducing contact resistance in organic  
transistors**

Lamport, *et al.*

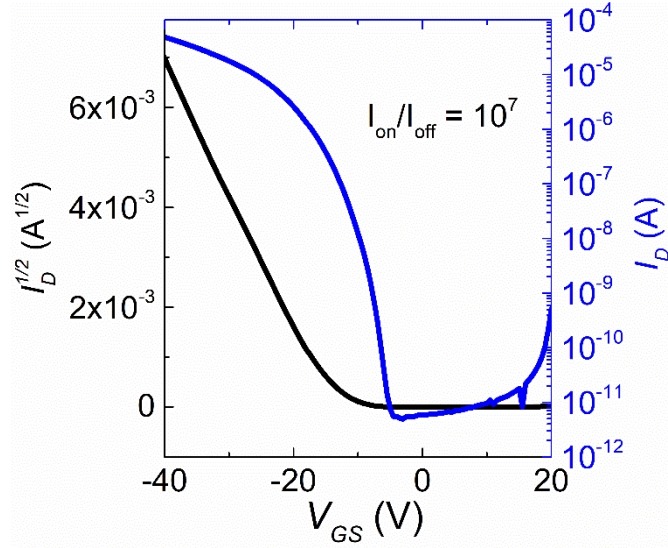

**Supplementary Figure 1 | OFET characteristics for a diF-TES ADT device.** Drain current as a function of gate-source voltage in a diF-TES ADT device with  $L = 40 \mu\text{m}$  and  $W = 800 \mu\text{m}$ , showing an on/off ratio greater than  $10^7$ .

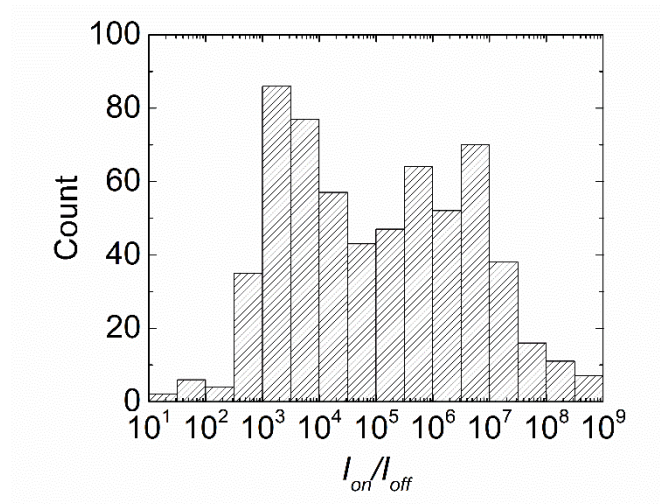

**Supplementary Figure 2 | diF-TES ADT  $I_{on}/I_{off}$  ratios.** A summary of the on/off ratios from 615 diF-TES ADT devices.

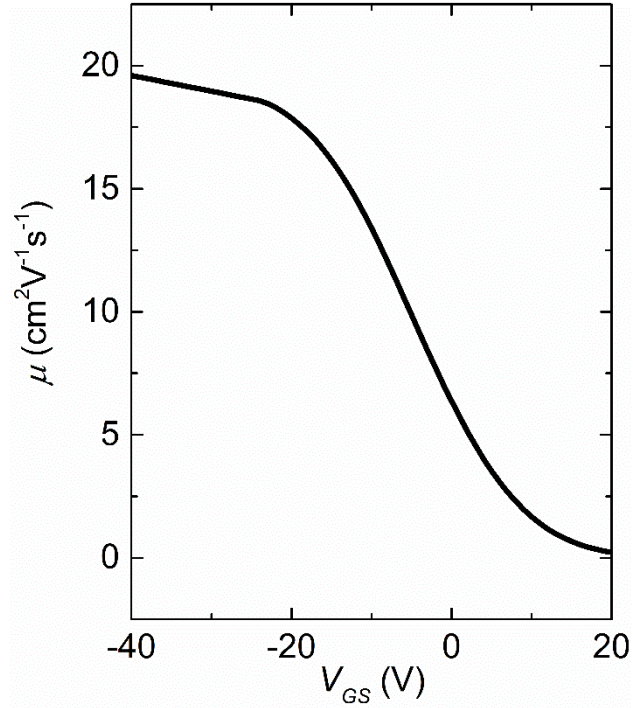

**Supplementary Figure 3 | Gate voltage dependence of the field-effect mobility.** Mobility vs. gate-source voltage for the device shown in Figure 1 with  $L = 100 \mu\text{m}$ ,  $W = 200 \mu\text{m}$ .

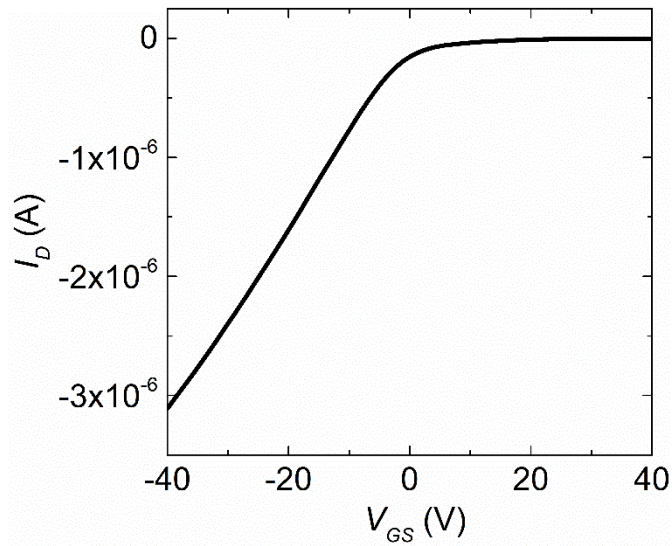

**Supplementary Figure 4 | OFET characteristics of diF-TES ADT in the linear regime.**  $I_D$  vs.  $V_{GS}$  in the linear regime ( $V_{DS} = -2\text{V}$ ) for diF-TES ADT device for which the saturation transfer plot is shown in Figure 1b. For this device  $L = 100 \mu\text{m}$ ,  $W = 200 \mu\text{m}$ ,  $V_{Th} = 3 \text{ V}$ ,  $\mu_{lin} = 16 \text{ cm}^2\text{V}^{-1}\text{s}^{-1}$ .

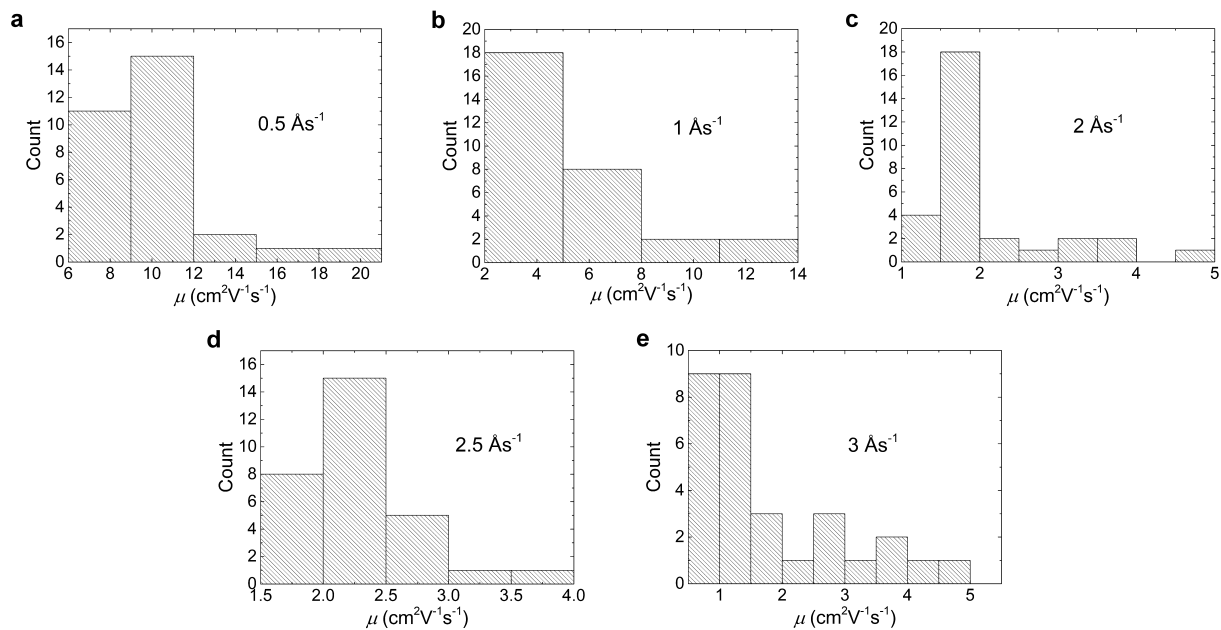

**Supplementary Figure 5 | diF-TES ADT mobility statistics at varying deposition rates.** The contact deposition rates are as follows: **a**,  $0.5 \text{ \AA s}^{-1}$ . **b**,  $1 \text{ \AA s}^{-1}$ . **c**,  $2 \text{ \AA s}^{-1}$ . **d**,  $2.5 \text{ \AA s}^{-1}$ . **e**,  $3 \text{ \AA s}^{-1}$ .

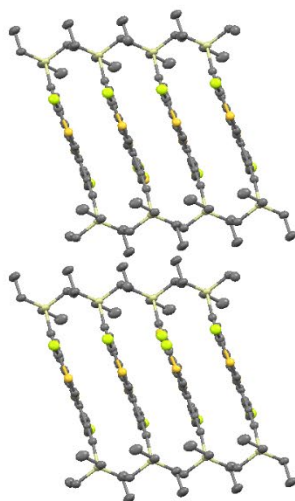

**Supplementary Figure 6 | Solid state packing in the organic semiconductor.** Side-view of the (001) orientation of the diF-TES ADT crystal.

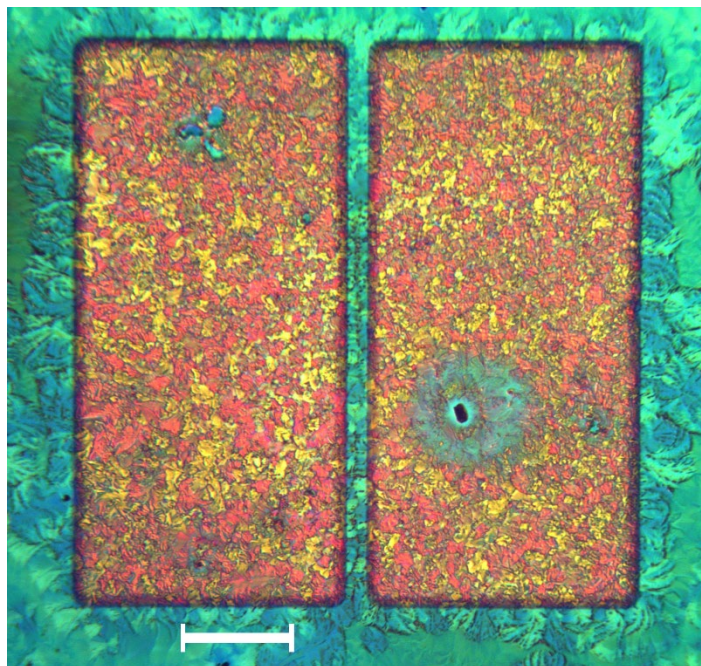

**Supplementary Figure 7 | Image of a diF-TES ADT film.** An optical micrograph of a spin-coated diF-TES ADT film on PFBT-treated Au showing the contact-induced crystallinity due to the interaction between the PFBT SAM and the diF-TES ADT molecules ( $L = 40 \mu\text{m}$ ). The scale bar represents  $200 \mu\text{m}$ .

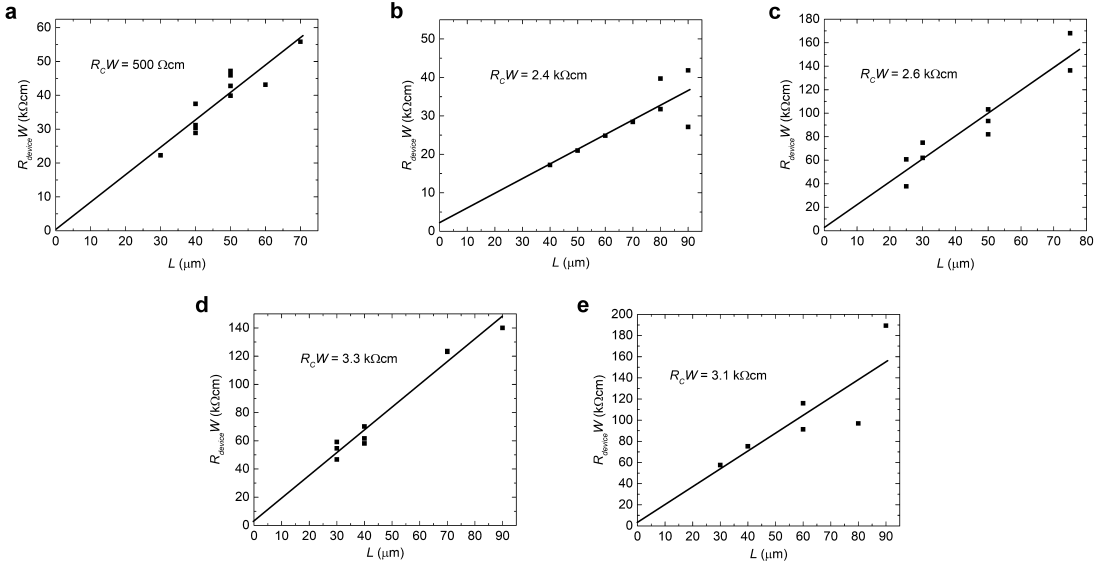

**Supplementary Figure 8 | Gated transmission line method.** Gated TLM measurements on diF-TES ADT OFETs fabricated with contacts deposited at varying rates. **a**,  $0.5 \text{ \AA s}^{-1}$ . **b**,  $1 \text{ \AA s}^{-1}$ . **c**,  $2 \text{ \AA s}^{-1}$ . **d**,  $2.5 \text{ \AA s}^{-1}$ . **e**,  $3 \text{ \AA s}^{-1}$ .

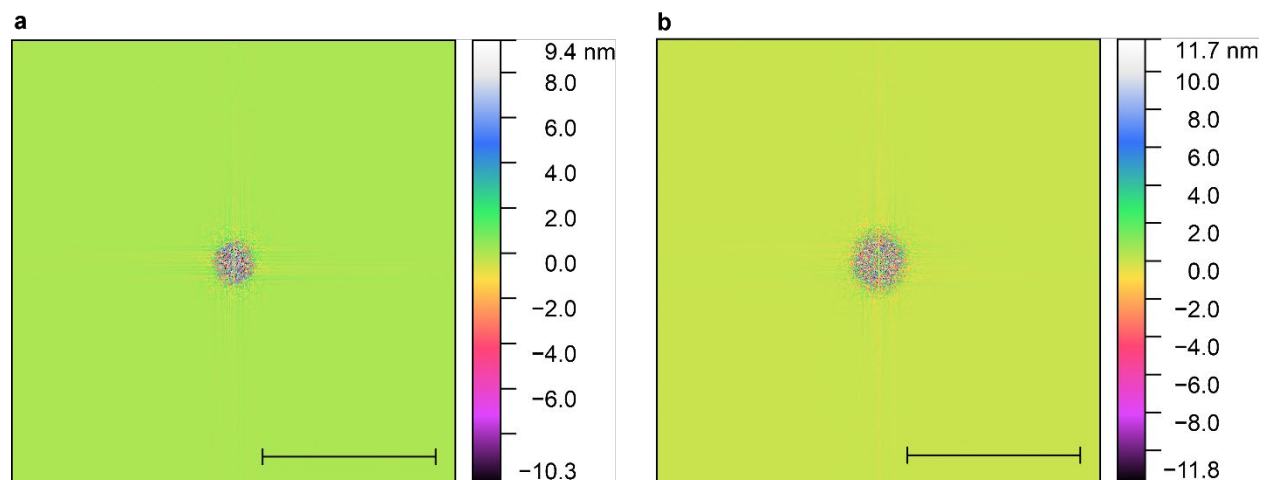

**Supplementary Figure 9 | Fast Fourier transforms.** 2D fast Fourier transforms to show the relative peak frequency in AFM images, and therefore the distance between metal particles, on **a**, 0.5 Å<sup>-1</sup> Au and **b**, 2.5 Å<sup>-1</sup> Au where the scale bars indicate 200 μm<sup>-1</sup>. Points that are further out in reciprocal space indicate smaller spacing between particles in real space of the AFM images.

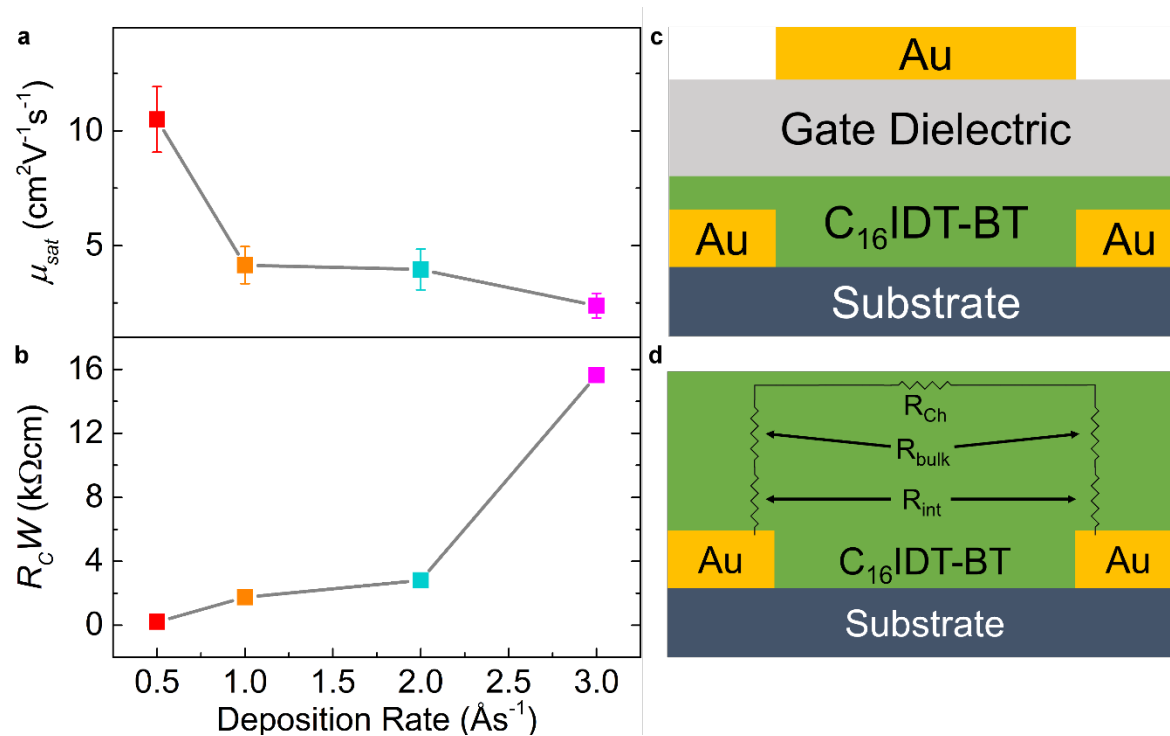

**Supplementary Figure 10 | Contact resistance of  $\text{C}_{16}\text{IDT-BT}$  devices. a**, Average field-effect mobility vs. contact deposition rate for  $\text{C}_{16}\text{IDT-BT}$  devices. **b**, Width-normalized contact resistance as a function of contact deposition rate. **c**, Schematic of bottom-contact, top-gate device structure. **d**, Equivalent circuit diagram showing the various sources of device resistance.



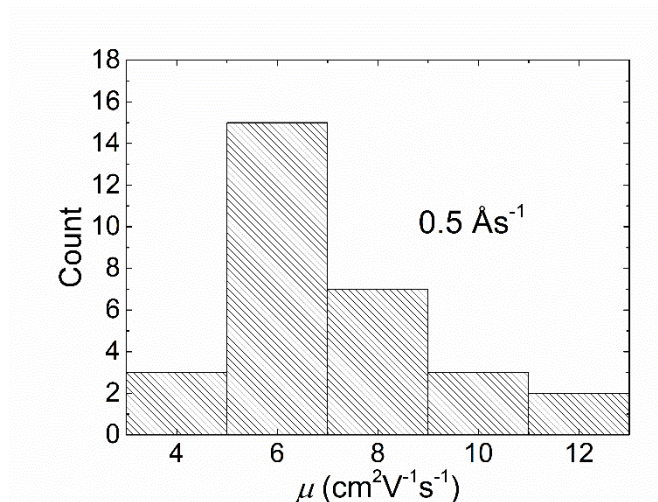

**Supplementary Figure 11 | C<sub>16</sub>IDT-BT devices.** Histogram showing the results of 30 devices made using C<sub>16</sub>IDT-BT with a contact deposition rate of 0.5 Ås<sup>-1</sup>.

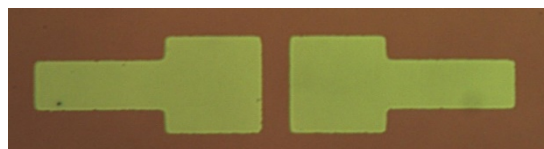

**Supplementary Figure 12 | Image of a C<sub>16</sub>IDT-BT film.** An optical micrograph of a spin-coated C<sub>16</sub>IDT-BT film on PFBT-treated Au contacts showing the uniformity of the polymer film ( $L = 50 \mu\text{m}$ ).

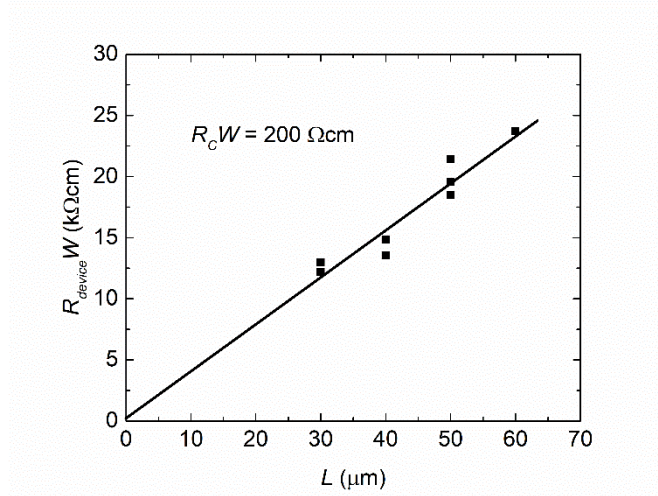

**Supplementary Figure 13 | C<sub>16</sub>IDT-BT contact resistance.** Gated TLM measurement on C<sub>16</sub>IDT-BT devices.
